# Supplementary material
Source: MDPI journal article supplement (https://www.mdpi.com/2073-4441/14/12/1938)
Supplement: s1 [file s1]

Supplementary Information for “Agricultural Irrigation Effects on Hydrological Processes in the United States Northern High Plains Aquifer Simulated by the Coupled SWAT-MODFLOW System”

Sijal Dangol<sup>1</sup>, Xuesong Zhang<sup>2,\*</sup>, Xin-Zhong Liang<sup>1,3</sup>, Fernando Miralles-Wilhelm<sup>4,5</sup>

<sup>1</sup>Department of Atmospheric and Oceanic Science, University of Maryland

College Park MD 20742 USA

<sup>2</sup>USDA-ARS Hydrology and Remote Sensing Laboratory, Beltsville, MD 20705 USA

<sup>3</sup>Earth System Science Interdisciplinary System, University of Maryland

College Park MD 20740 USA

<sup>4</sup>Department of Atmospheric, Oceanic and Earth Sciences, George Mason University

Fairfax VA 22030 USA

<sup>5</sup>The Nature Conservancy, Arlington VA 22203 USA

\*Corresponding author:

Xuesong Zhang

USDA-ARS Hydrology and Remote Sensing Laboratory

Beltsville, MD 20705 USA

Email: xuesong.zhang@usda.gov

## 1. SWAT setup

### 1.1 Reservoir parameters and operation

Reservoir operations were simulated using the target release method with a specified minimum and maximum monthly discharge. The target release method represents the general rules of reservoir operation (water preservation and flood control) and simulates reservoir water release as a function of reservoir target storage. The reservoir target storage is set at the emergency spillway elevation for the non-flood season and at the primary spillway elevation for the flood season. The minimum and maximum monthly flow from each reservoir was estimated based on the discharge information obtained from US Army Corps of Engineers (USACE), US Bureau of Reclamation (USBR) and US Geological Survey (USGS) and converted to the SWAT input format. Reservoir parameters such as surface area and storage volume at the principal spillway and emergency spillway were obtained from the USACE and the USBR (USBR, 2019; USACE, 2013). The reservoirs simulated in the model and their corresponding parameters are listed in Table S1.

Table S1. Reservoir summary

| S.No | Name                 | ESA <sup>1</sup><br>(ha) | EVOL <sup>2</sup><br>(10 <sup>4</sup> m <sup>3</sup> ) | PSA <sup>3</sup><br>(ha) | PVOL <sup>4</sup><br>(10 <sup>4</sup> m <sup>3</sup> ) |
|------|----------------------|--------------------------|--------------------------------------------------------|--------------------------|--------------------------------------------------------|
| 1    | Bonny reservoir      | 2038.07                  | 15889.69                                               | 133.96                   | 88.32                                                  |
| 2    | Box butte reservoir  | 832.87                   | 5638.24                                                | 649.54                   | 3830                                                   |
| 3    | Calamus reservoir    | 2127.10                  | 16354.71                                               | 1181.72                  | 6439.38                                                |
| 4    | Cedar Buff reservoir | 4366.71                  | 46549.81                                               | 2779.88                  | 847.28                                                 |
| 5    | Enders dam           | 973.30                   | 9193.13                                                | 266.29                   | 1228.42                                                |
| 6    | Grayrocks reservoir  | 1462.46                  | 13283.35                                               | 798.47                   | 4663.73                                                |
| 7    | Guernsey reservoir   | 964.00                   | 5525.99                                                | 542.30                   | 1945.81                                                |
| 8    | Harlan county lake   | 9232.42                  | 102230.82                                              | 5397.89                  | 39445.09                                               |
| 9    | Harry strunk         | 1409.57                  | 6502.29.29                                             | 368.6868                 | 1788.67                                                |
| 10   | Kanopolis lake       | 5648.80                  | 45549.70                                               | 3660.51                  | 6102.52                                                |
| 11   | Kirwin reservoir     | 4305.60                  | 38801.33                                               | 2052.23                  | 12264.74                                               |
| 12   | Lake Mcconaughey     | 12308.14                 | 216636.09                                              | 8903.40                  | 177312.75                                              |
| 13   | Merritt reservoir    | 1303.94                  | 10640.12                                               | 1177.27                  | 9203.24                                                |

|    |                        |          |           |         |          |
|----|------------------------|----------|-----------|---------|----------|
| 14 | Milford lake           | 13446.60 | 93333.61  | 6357.43 | 47959.68 |
| 15 | Norton                 | 2151.39  | 16696.02  | 882.65  | 4456.19  |
| 16 | Red willow/Hugh butler | 1085.00  | 10493.21  | 289.36  | 1100.39  |
| 17 | Trenton/Swanson dam    | 3231.53  | 30389.49  | 792.40  | 2571.93  |
| 18 | Turtle creek lake      | 21732.39 | 278419.26 | 4998.05 | 41333.91 |
| 19 | Waconda lake           | 13631.11 | 89179.12  | 5100.03 | 23828.74 |
| 20 | Webster reservoir      | 3431.05  | 32159.66  | 1403.09 | 9543.43  |
| 21 | Wheatland reservoir 2  | 3278.07  | 18528.35  | 2792.43 | 13868.76 |
| 22 | Wilson reservoir       | 13712.05 | 205620.50 | 3660.51 | 29915.34 |

<sup>1</sup>Emergency spillway area

<sup>2</sup>Emergency spillway volume

<sup>3</sup>Principal spillway area

<sup>4</sup>Principal spillway volume

## 2. SWAT-MODFLOW coupling

### 2.1 SWAT irrigation source assignment

To determine the appropriate irrigation source for cropland HRUs in SWAT, the grid based irrigation well locations from the Peterson et al. (2016) model were used to determine SWAT cropland HRUs irrigated with groundwater. Each MODFLOW well was mapped to the overlapping HRU (cropland) using ArcGIS. Then the irrigation source was assigned using the following framework: (i) if an irrigation well was mapped to the HRU classified as irrigated cropland, groundwater was assigned as the irrigation source (ii) if a HRU classified as irrigated cropland was not associated with any irrigation well, the river was assigned as the irrigation source, and (iii) if an irrigation well was mapped to the dry cropland, then the auto-irrigation function was used with groundwater as the irrigation source.

## Results

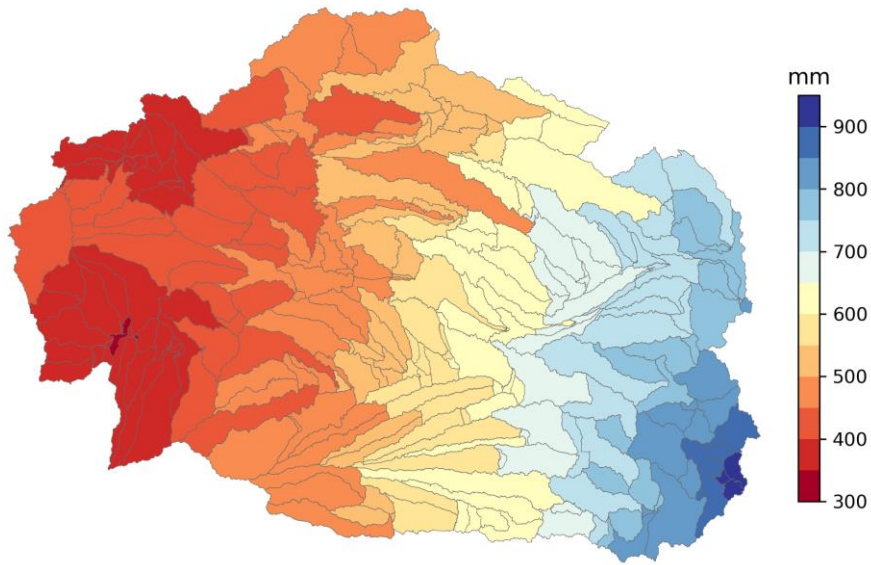

Figure S1. North American Regional Reanalysis (NARR) based average annual precipitation (1982-2008) at the sub-basin scale for SWAT domain.

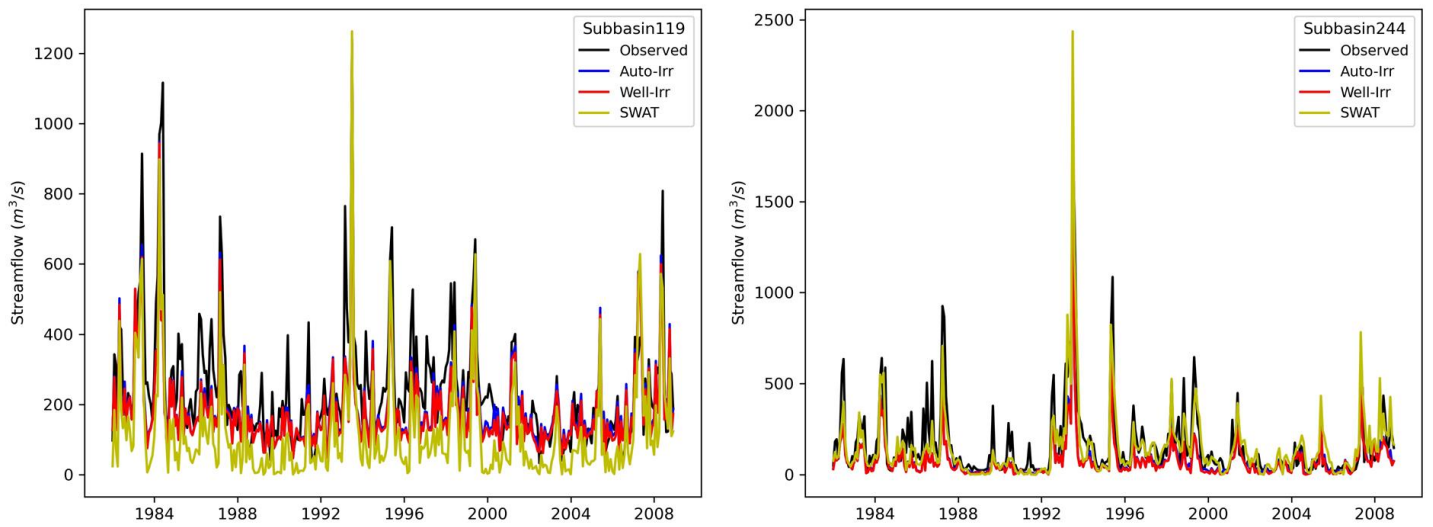

Figure S2. Monthly mean streamflow at the outlet of watersheds in Northern High Plains.

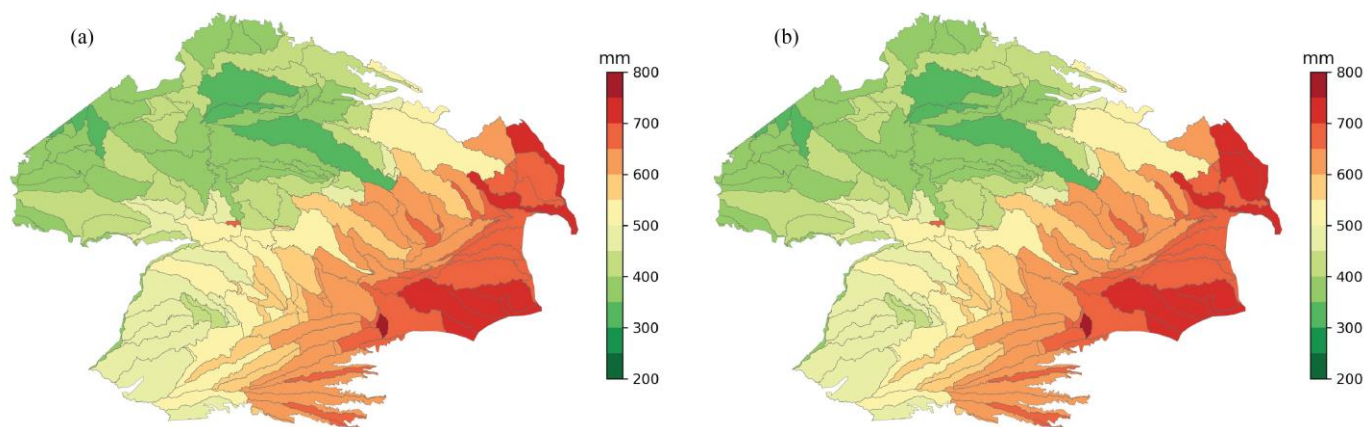

Figure S3. Sub-basin level mean annual evapotranspiration simulated by (a) SWAT only and (b) Well-Irr, for 2000-2008.

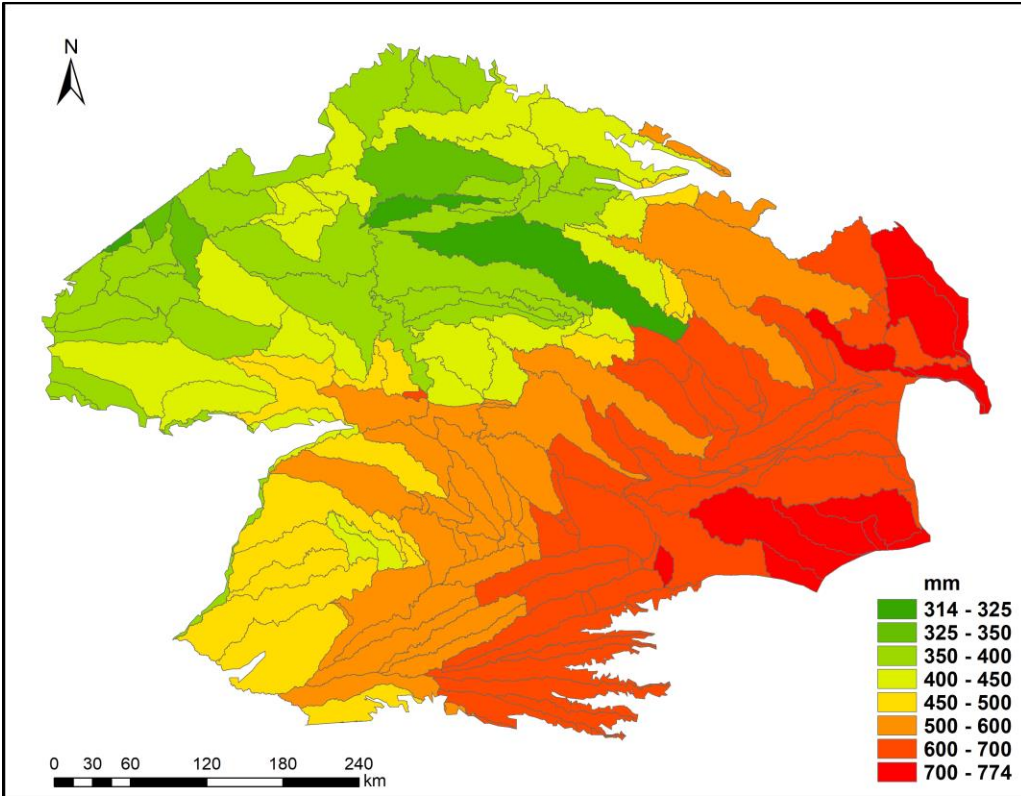

Figure S4. Sub-basin level mean annual evapotranspiration estimated from Moderate Resolution Imaging Spectroradiometer (MODIS) from 2000-2008.
